# Supplementary material for: スルファミン酸Ni浴における陽極酸化挙動および電析膜の特性(工業化学専攻,平成15年度修士論文要旨,工学部創設40周年記念号)
Source: Frontiers journal article supplement (doi:10.3389/fphar.2022.819787), 2004-12-20
Supplement: Data_Sheet_1.ZIP [file Data_Sheet_1.ZIP]

## Sheet: figure1
tissue blood glucos			BUN			Creatinine			urine microalbumin ( ug/24h)
NC	DM	ATO	NC	DM	ATO	NC	DM	ATO	NC	DM	ATO
6.7	21.08	25.12	7.54	19.16	11.73	13	42	25	3.76	23.4	6
7.4	18.65	16.91	7.18	24.79	10.88	14	49	18	3.6	14	8.14
7.04	24.79	12.67	6.8	16.75	12.99	17	57	21	3.8	14	9
9.8	20.78	24.87	8.31	18.89	10.78	12	59	17	4	18.3	7.7
8.45	28.54	21.39	8.38	25.72	11.39	11	44	16	2.3	18.11	6.86
9.05	25.12	15.89	9.28	15.66	11.66	11	44	16	2	19.77	8
tubulo- interstitial injury			Mesangial expansion index			CVF
NC	DM	ATO	NC	DM	ATO	NC	DM	ATO
0	2	1	0.9638	7.55371	3.1186	1.522	19.383	8.716
0	3	1	0.6765	6.4	2.21758	1.046	16.79	6.595
1	3	2	1.52876	7.6	2.21758	0.788	13.164	5.535
1	2	2	0.96412	6.7546	1.87223	1.512	22.995	8.302
0	3	2	0.7794	7.93006	3.57059	0.549	16.128	6.923
1	2	2	0.9638	5.98093	3.57059	0.465	20.871	7.263
Wb	Febronectin		Wb	col1		Wb	a-SMA		Wb	IL-6
NC	DM	ATO	NC	DM	ATO	NC	DM	ATO	NC	DM	ATO
0.282836	2.50581	0.770364	0.684962	2.85276	1.43989	0.117	0.785	0.301	0.2924	1.23945	0.70193
0.458883	2.79293	0.909249	0.351944	2.48155	1.92635	0.098	0.712	0.287	0.26322	1.53258	1.0203
0.443669	2.3865	0.879303	0.245217	3.09972	1.47426	0.09	0.723	0.264	0.724	2.02827	1.1234
0.62821	3.06979	0.640909	0.6229	3.1	1.65552	0.117	0.85	0.301	0.6312	3.1	0.841635
0.483009	2.81343	0.9265	0.34498	2.978	1.2798	0.098	0.921	0.287	0.599	2.121	1.0274
0.366893	1.65154	0.87145	0.26763	2.6887	1.34728	0.09	0.923	0.264	0.325	1.778	0.792715

## Sheet: figure2
Triglyceride (mmol/L)			Total cholesterol			PPAR-a
NC	DM	ATO	NC	DM	ATO	NC	PPAR-a siRNA
1.12	2.3	1.25	2.23	3.19	2.56	1	0.49
0.97	3.1	1.03	2.32	3.3	2.03	1.01	0.6
0.86	3.17	1.25	2.34	3.56	2.44	0.7	0.33
1.03	1.97	1.61	2.13	3.39	2.15	ACOX1
0.61	2.51	1.52	1.92	3.34	2.33	NC	PPAR-a siRNA
0.75	2.11	1.33	1.93	3.2	2.39	1.03	0.39
MDA			T-SOD			1.01	0.29
NC	DM	ATO	NC	DM	ATO	0.92	0.27
5.3	18.11	11.5	31.0026	6.53985	16.3496	CPT1a
3.7	18.6	12.2	37.3265	6.3671	15.9177	NC	PPAR-a siRNA
4.1	17.4	10.6	40.874	5.9599	14.8997	0.927	0.52
4.5	17.6	15.6	35.23	6.68792	10.7866	1.07	0.59
3.5	18.8	13.7	33.59	5.98	18.0154	0.98	0.47
4.4	19.2	15	35.99	4.79	15.6015
Wb	CPT1a		Wb	PPAR-a		Wb	Mfn1		Wb	Drp1
NC	DM	ATO	NC	DM	ATO	NC	DM	ATO	NC	DM	ATO
1.337	0.742	0.789	1.52	0.75	1.081	0.584	0.171	0.4	0.225	0.747	0.251
1.686	0.495	0.893	1.409	0.99	1.326	0.64	0.171	0.507	0.281	0.904	0.239
1.6	0.429	0.998	1.771	0.644	1.096	0.578	0.146	0.45	0.305	0.821	0.239
1.592	0.596	0.677	1.791	0.782	1.044	0.61399	0.144042	0.51	0.20892	0.90369	0.269021
1.876	0.154	0.794	1.629	0.786	1.053	0.61532	0.196893	0.414	0.101298	0.85888	0.325381
1.133	0.525	0.726	1.612	0.518	1.341	0.52681	0.197875	0.37997	0.109925	0.85903	0.295618
IHC	PPAR-a		IHC	Mfn1
NC	DM	ATO	NC	DM	ATO
30.1421	4.7749	28.6559	16.9336	4.0956	14.3788
34.9702	8.9357	17.4624	15.5136	6.5644	17.9993
24.0235	4.8938	26.8295	14.5487	8.9596	15.8509
40.4616	6.6687	19.2409	14.8545	4.9816	17.553
43.3452	6.6187	16.7146	14.12	9.8569	12.7716
42.4949	4.1716	16.7707	14.9847	4.3354	11.6429

## Sheet: figure3
Wb PPAR-a		correlation analysis
NC	miR-21 mimics	miR-21	PPARα protein
3.21247	1.835	3.20428	0.518
5.817	2.544	2.79419	0.644
4.443	1.2012	1.59463	0.75
luicifarese		1	0.782
miR-NC	miR-21 mimics	0.954842	0.786
0.1	0.05	0.862542	0.99
0.1	0.07	tissue PCR	miR21		tissue PCR	PPARα
0.09	0.065	NC	DM	ATO	NC	DM	ATO
luicifarese	mut-PPAR	0.1593	1	0.9044	1.45397	0.127797	1.39352
miR-NC	miR-21 mimics	0.33	1.89	0.4914	2.77022	0.118415	1.26681
0.11	0.09	0.1384	1.7942	0.5434	1.39474	0.292194	1.55994
0.11	0.1	0.1866	1.1006	0.4038	2.20428	0.276104	1.27979
0.1	0.1	0.4229	1.0105	0.3597	1.67404	0.488016	1.49483
		0.2745	1.0595	0.6199	1.54149	0.351957	1.47897

## Sheet: figure4
wb	FN				wb	FN				wb	FN		wb	FN		wb	FN
NG	HG	HG+Veh	HG+miR-21 inhibitor		NC	PA	PA+Veh	PA+miR-21 inhibitor		HG	HG+Fenofibrate		PA	PA+Fenofibrate		HG+PA	HG+PA+Fenofibrate
0.199	1.218	1.305	0.441		0.297	1.418	1.5505	0.541		0.76	0.385		0.946	0.376		0.889	0.459
0.296	1.169	0.979	0.526		0.269	1.569	1.379	0.3726		0.732	0.434		0.938	0.434		0.922	0.535
0.287	1.278	1.201	0.506		0.287	1.4278	1.4201	0.4506		0.85	0.469		0.943	0.373		0.987	0.538
wb	PPARa				wb	PPARa				wb	PPARa		wb	PPARa		wb	PPARa
NG	HG	HG+Veh	HG+miR-21 inhibitor		NC	PA	PA+Veh	PA+miR-21 inhibitor		HG	HG+Fenofibrate		PA	PA+Fenofibrate		HG+PA	HG+PA+Fenofibrate
1.083	0.213	0.19	1.046		0.57	0.274	0.32	0.39		0.4536	0.8208		0.648	0.863		0.502	0.69
1.279	0.218	0.257	1.032		0.555	0.284	0.223	0.36		0.4968	0.8766		0.706	0.909		0.435	0.833
1.047	0.215	0.284	0.84		0.508	0.319	0.167	0.367		0.3798	1.0692		0.779	0.983		0.5	0.752
wb	Mfn1				wb	Mfn1				wb	Mfn1		wb	Mfn1		wb	Mfn1
NG	HG	HG+Veh	HG+miR-21 inhibitor		NC	PA	PA+Veh	PA+miR-21 inhibitor		HG	HG+Fenofibrate		PA	PA+Fenofibrate		HG+PA	HG+PA+Fenofibrate
1.04	0.369	0.396	0.891		1.648	1.279	1.231	1.901		0.406	0.711		0.286	0.637		0.281	0.623
1.002	0.415	0.515	0.919		1.993	1.31	1.224	1.835		0.506	0.66		0.317	0.706		0.304	0.69
1.044	0.4	0.467	0.85		2.411	1.339	1.151	1.63		0.468	0.727		0.314	0.637		0.3	0.624
wb	Drp1				wb	Drp1				wb	Drp1		wb	Drp1		wb	Drp1
NG	HG	HG+Veh	HG+miR-21 inhibitor		NC	PA	PA+Veh	PA+miR-21 inhibitor		HG	HG+Fenofibrate		PA	PA+Fenofibrate		HG+PA	HG+PA+Fenofibrate
0.308	1.164	0.887	0.278		0.281	0.617	0.501	0.182		0.619	0.341		0.971	0.428		0.951	0.49
0.253	0.882	0.982	0.302		0.191	0.427	0.594	0.216		0.707	0.253		0.935	0.406		0.922	0.621
0.219	0.771	1.011	0.431		0.172	0.497	0.567	0.28		0.736	0.24		0.996	0.433		0.99	0.561
wb	IL6				wb	IL6				wb	IL6		wb	IL6		wb	IL6
NG	HG	HG+Veh	HG+miR-21 inhibitor		NC	PA	PA+Veh	PA+miR-21 inhibitor		HG	HG+Fenofibrate		PA	PA+Fenofibrate		HG+PA	HG+PA+Fenofibrate
0.127	0.697	0.869	0.316		0.3	0.607	0.562	0.307		0.516	0.186		0.503	0.351		0.68	0.5
0.145	0.707	0.816	0.215		0.183	0.487	0.611	0.427		0.519	0.246		0.574	0.304		0.78	0.456
0.189	0.826	0.836	0.212		0.236	0.555	0.619	0.49		0.646	0.401		0.493	0.245		0.702	0.308

## Sheet: figure 5
ATP level
NC	HG+PA	HG+PA+VEH	HG+PA+ATO	HG+PA+ATO+miR-21 mimics
2.36	0.38	0.23	1.15	0.82
2.56	0.21	0.26	1.69	0.46
2.33	0.38	0.35	1.48	0.72
JC-1
NC	HG+PA	HG+PA+VEH	HG+PA+ATO	HG+PA+ATO+miR-21 mimics
0.1212	0.6864	0.6634	0.2304	0.4722
0.0853	0.6865	0.6996	0.2535	0.4734
0.1497	0.6938	0.6938	0.2543	0.4421
ROS
NC	HG+PA	HG+PA+VEH	HG+PA+ATO	HG+PA+ATO+miR-21 mimics
1.00222	2.08245	2.00507	1.18446	1.74022
1.00972	1.98443	1.98443	1.29089	1.64346
0.988059	1.89986	1.84727	1.40558	1.66709
Wb FN
HG+PA	HG+PA+Veh	HG+PA+ATO	HG+PA+ATO+miR-21 mimics
1.224	0.886	0.677	1.164
1.058	1.044	0.692	1.218
1.145	1.133	0.842	1.102
Wb PPAR
HG+PA	HG+PA+Veh	HG+PA+ATO	HG+PA+ATO+miR-21 mimics
0.686	0.425	0.927	0.7
0.465	0.371	1.124	0.74
0.533	0.659	0.969	0.592
Wb Mfn1
HG+PA	HG+PA+Veh	HG+PA+ATO	HG+PA+ATO+miR-21 mimics
0.337	0.42	0.971	0.577
0.494	0.501	0.881	0.469
0.412	0.463	0.973	0.563
Wb Drp1
HG+PA	HG+PA+Veh	HG+PA+ATO	HG+PA+ATO+miR-21 mimics
1.103	1.171	0.639	0.99
1.144	1.206	0.762	1.025
1.175	1.046	0.576	1.084
Wb Il6
HG+PA	HG+PA+Veh	HG+PA+ATO	HG+PA+ATO+miR-21 mimics
0.751	0.802	0.489	0.729
0.8	0.869	0.423	0.684
0.809	0.86	0.474	0.76
