# Supplementary material for: スルファミン酸Ni浴における陽極酸化挙動および電析膜の特性(工業化学専攻,平成15年度修士論文要旨,工学部創設40周年記念号)
Source: Frontiers journal article supplement (doi:10.3389/fphar.2022.819787), 2004-12-20
Supplement: Data_Sheet_4.ZIP [file Data_Sheet_4.ZIP]

## Sheet: Sheet1
NC	HG+PA	HG+PA+VEH	HG+PA+ATO	HG+PA+ATO+miR-21 mimics
0.33	0.09	0.1	0.22	0.12
0.32	0.1	0.1	0.21	0.1
0.34	0.11	0.11	0.25	0.15
0.34	0.09	0.08	0.26	0.14
0.35	0.12	0.11	0.24	0.12
0.32	0.1	0.1	0.24	0.11
